# Supplementary material for: Retraction
Source: HighWire-hosted journal article supplement (doi:10.1136/heartjnl-2012-302337), 2012-08-21
Supplement: heartjnl-2012-302337-s3.pdf [file heartjnl-2012-302337-s3.pdf]

Supplemental Table 1

## Characteristics of each trial

|                               | <b>Licata<br/>2003</b>                                                                                                                                               | <b>Paterna<br/>2005</b>                                                                                                                                                  | <b>Paterna<br/>2008</b>                                                                                                                                                             | <b>Parinello<br/>2009</b>                                                                                                                                                             | <b>Paterna<br/>2009</b>                                              | <b>Paterna<br/>2011</b>                                                                                                                                                         |
|-------------------------------|----------------------------------------------------------------------------------------------------------------------------------------------------------------------|--------------------------------------------------------------------------------------------------------------------------------------------------------------------------|-------------------------------------------------------------------------------------------------------------------------------------------------------------------------------------|---------------------------------------------------------------------------------------------------------------------------------------------------------------------------------------|----------------------------------------------------------------------|---------------------------------------------------------------------------------------------------------------------------------------------------------------------------------|
| <b>Patients<br/>(n)</b>       | 54<br>vs. 53                                                                                                                                                         | 46<br>vs. 48                                                                                                                                                             | 114<br>vs. 118                                                                                                                                                                      | 86<br>vs. 87                                                                                                                                                                          | 179<br>vs. 191                                                       | 890<br>vs. 881                                                                                                                                                                  |
| <b>Inclusion<br/>criteria</b> | Refractory CHF (NYHA class IV), ejection fraction (EF) < 35%, creatinine < 2 mg/dl, blood urea nitrogen (BUN) ≤ 60 mg/dl, reduced urinary volume and low natriuresis | Uncompensated (NYHA class IV), EF < 25%, creatinine < 2 mg/dl, BUN < 60 mg/dl, reduced urinary volume and low natriuresis (< 500 ml/24 h and < 60 mEq/24h, respectively) | Compensated (NYHA class II) hospitalized within previous 30 days for recently decompensated (Class IV) CHF, EF < 35%, creatinine < 2 mg/dl, baseline urinary output of 2,500 ml/day | Recently hospitalized but in a compensated state (NYHA class II), EF < 35%, creatinine < 2 mg/dl, BUN ≤ 60 mg/dl, urinary volume (< 500 ml/24 hours) and low natriuresis (< 60 mEq/24 | Compensated HF (NYHA class II-IV), EF < 35% and creatinine < 2 mg/dl | Hospitalized uncompensated (NYHA class III) subsequently discharged (NYHA class II), EF < 40%, creatinine < 2.5 mg/dl, BUN < 60 mg/dl and reduced urinary volume (< 800 ml/day) |

|                 |                                                                                                                                                                                                                                                                          |                                                                                                                                                                                                                                                                                 |                                                                                                                                                                                                                                                                  | hours)                                                                                                                                                                                                                                                                      |                                                                                                                                                                                                                    |                                                                                                                                                                                                                                                                                   |
|-----------------|--------------------------------------------------------------------------------------------------------------------------------------------------------------------------------------------------------------------------------------------------------------------------|---------------------------------------------------------------------------------------------------------------------------------------------------------------------------------------------------------------------------------------------------------------------------------|------------------------------------------------------------------------------------------------------------------------------------------------------------------------------------------------------------------------------------------------------------------|-----------------------------------------------------------------------------------------------------------------------------------------------------------------------------------------------------------------------------------------------------------------------------|--------------------------------------------------------------------------------------------------------------------------------------------------------------------------------------------------------------------|-----------------------------------------------------------------------------------------------------------------------------------------------------------------------------------------------------------------------------------------------------------------------------------|
| <b>Protocol</b> | <p>Group 1:<br/>2.8 g/day Na plus IV furosemide (500 mg-1000 mg BID) plus HSS.</p> <p>Group 2:<br/>1.8 g/day Na, same furosemide without HSS. All patients received ACE-Is (100%). Spironolactone (25 mg) was added to treatment in both groups in 1999. Both groups</p> | <p>Group 1:<br/>2.8 g/day Na, IV furosemide (500-1,000 mg) BID plus HSS.</p> <p>Group 2:<br/>1.8 g/day Na, same furosemide, without HSS. All patients were on ACE-Is and were allowed to receive spironolactone and carvedilol. Both groups received 1 L fluid restriction.</p> | <p>Group 1:<br/>2.8 g/day Na, furosemide 250-500mg PO BID</p> <p>Group 2:<br/>1.8 g/day Na, same furosemide. All patients received ACE-Is (100%), spironolactone 25 mg (87%) and carvedilol 6.25-25 mg BID (8%). Both groups received 1 L fluid restriction.</p> | <p>Group 1:<br/>2.8 g/day Na plus oral furosemide (125 mg-250 mg BID, 2/3rds of patients received 125 mg BID).</p> <p>Group 2:<br/>1.8 g/day Na plus same furosemide. All patients received ACE-Is (100%), spironolactone 25 mg (75%) and carvedilol (55%). Both groups</p> | <p>8 groups placed on 1.8 g/day or 2.8 g/day of Na intake along with 1 or 2 L fluid restriction and 125-250 mg furosemide BID. All patients received ACE-Is (100%), spironolactone (93%) and carvedilol (37%).</p> | <p>1.8 g/day without HSS or 2.8 g/day of Na with HSS(stopped once compensated). 50-125 mg furosemide BID (2/3rds of patients received 50 mg BID). Patients were also on ACE-Is (100%), spironolactone (85%) and carvedilol (70%). Both groups received 1 L fluid restriction.</p> |

|                                                           |                                                 |                                                                             |                                                |                                                 |                                                                                                                                 |                                                 |
|-----------------------------------------------------------|-------------------------------------------------|-----------------------------------------------------------------------------|------------------------------------------------|-------------------------------------------------|---------------------------------------------------------------------------------------------------------------------------------|-------------------------------------------------|
|                                                           | received 1 L<br>fluid<br>restriction.           |                                                                             |                                                | received 1 L<br>fluid<br>restriction.           |                                                                                                                                 |                                                 |
| <b>Starting<br/>and<br/>ending<br/>serum<br/>sodium</b>   | 134.8 →<br>130.2<br>vs.<br>135.8<br>→142.3      | 134.9 →<br>130.1 at<br>discharge<br>vs.<br>133.8 →<br>142.3 at<br>discharge | 138.3 →<br>132.3<br>vs.<br>138.7 →<br>139.5    | 138.8 →<br>131.9<br>vs.<br>138.7 →<br>139.5     | 140 → 133<br>1L<br>140 → 132<br>2L<br>vs.<br>140 → 140<br>1L<br>140 → 134.5<br>2L                                               | 138.8 →<br>131.5<br>vs.<br>137.8 →<br>137.8     |
| <b>Follow-<br/>up</b>                                     | 31 months<br>(2.6 years)                        | 30 days                                                                     | 180 days                                       | 12 months                                       | 180 days                                                                                                                        | 57 months<br>(4.75 years)                       |
| <b>Starting<br/>and<br/>ending<br/>blood<br/>pressure</b> | 134/77 →<br>114/72<br>vs.<br>137/75 →<br>115/68 | 146/82 → ND<br>vs.<br>145/80 → ND                                           | 126/82 →<br>107/77<br>vs.<br>125/83<br>→111/75 | 126/82 →<br>107/77<br>vs.<br>125/83 →<br>111/75 | 250 mg then<br>125 mg<br>furosemide<br>groups: 1L<br>then 2L<br>114/71 →<br>112/77,<br>112/72→<br>107/80,<br>115/69→<br>111/83, | 134/77 →<br>115/68<br>vs.<br>137/75 →<br>112/65 |

|                             |                                                                                             |                                                                                 |                                                                         |                                                                         |                                                                                                                                              |                                                                      |
|-----------------------------|---------------------------------------------------------------------------------------------|---------------------------------------------------------------------------------|-------------------------------------------------------------------------|-------------------------------------------------------------------------|----------------------------------------------------------------------------------------------------------------------------------------------|----------------------------------------------------------------------|
|                             |                                                                                             |                                                                                 |                                                                         |                                                                         | 113/71 →<br>108/78<br>vs.<br>113/71 →<br>110/68,<br>115/69 →<br>111/83,<br>111/70 →<br>111/70,<br>116/71 →<br>112/88                         |                                                                      |
| <b>HF etiology (% or n)</b> | CAD (62.9% vs. 61.9%)<br>HHD (32.4% vs. 33.6%)<br>DCM (4.6% vs. 4.4%)<br>AF (14% vs. 13.4%) | CAD (48% vs. 50%)<br>HHD (28% vs. 29%)<br>DCM (24% vs. 21%)<br>AF (17% vs. 15%) | CAD (53 vs. 57)<br>HHD (37 vs. 39)<br>DCM (24 vs. 22)<br>AF (26 vs. 25) | CAD (43 vs. 41)<br>HHD (28 vs. 29)<br>DCM (16 vs. 16)<br>AF (29 vs. 31) | 250 mg then 125 mg furosemide groups:<br>DM (26.9%, 25.4% vs. 30.7%, 28%)<br>CAD (53.8%, 50.9% vs. 59.6%, 52%)<br>HHD (42.3%, 47% vs. 38.4%, | CAD (31 vs. 31)<br>HHD (14 vs. 12)<br>DCM (9 vs. 10)<br>AF (7 vs. 8) |

|                                                                         |                                  |                                                        |                                 |                                   |                                                                                                                                                                              |                                 |
|-------------------------------------------------------------------------|----------------------------------|--------------------------------------------------------|---------------------------------|-----------------------------------|------------------------------------------------------------------------------------------------------------------------------------------------------------------------------|---------------------------------|
|                                                                         |                                  |                                                        |                                 |                                   | 44%)<br>DC (3.8%,<br>1.9% vs.<br>1.9%, 4%)<br>AF (38.4%,<br>37.2% vs.<br>40.3%, 38%)                                                                                         |                                 |
| <b>EF (%)</b>                                                           | 34.4<br>vs. 33.7                 | 30.2 → 31.1<br>(at 6 days)<br>30.1 → 32<br>(at 6 days) | 29 → 30.2<br>vs.<br>29.5 → 32.2 | 29.3 → 30.2<br>vs.<br>29.5 → 32.5 | ND                                                                                                                                                                           | 30.3 → 31.3<br>vs.<br>30.4 → 32 |
| <b>Starting<br/>and<br/>ending<br/>serum<br/>creatinine<br/>(mg/dl)</b> | 1.61 → 2.2<br>vs.<br>1.65 → 1.62 | 1.55 → 1.97<br>vs.<br>1.51 → 1.55                      | 1.5 → 2.1<br>vs.<br>1.56 → 1.54 | 1.55 → 2.1<br>vs.<br>1.56 → 1.45  | 250 mg then<br>125 mg<br>furosemide<br>groups:<br>1.47 → 2.0,<br>1.49 → 2.3,<br>1.49 → 1.97<br>1.47 → 2.2<br>vs.<br>1.45 → 1.48<br>1.46 → 1.75<br>1.46 → 1.49<br>1.48 → 1.74 | 1.65 → 1.95<br>vs.<br>1.6 → 1.4 |
| <b>Starting</b>                                                         | 56 → 117                         | 56.1 → 98                                              | 56.5 → 105                      | 56.5 → 105                        | 250 mg then                                                                                                                                                                  | 58.2 → 97                       |

|                               |             |         |             |             |                                                                                                                        |         |
|-------------------------------|-------------|---------|-------------|-------------|------------------------------------------------------------------------------------------------------------------------|---------|
| <b>and ending BUN (mg/dl)</b> | vs.         | vs.     | vs.         | vs.         | 125 mg                                                                                                                 | vs.     |
|                               | 58.2 → 73.3 | 62 → 65 | 58.5 → 68.4 | 58.5 → 68.4 | furosemide groups:<br>53 → 102,<br>53 → 115,<br>52 → 93<br>52 → 101<br>vs.<br>53 → 52<br>50 → 71<br>52 → 51<br>51 → 68 | 62 → 70 |

AF = atrial fibrillation, DCM = dilated cardiomyopathy, DM = diabetes mellitus, EF = ejection fraction, LS = low sodium, L = liter of fluid

given, BID = twice daily, ND = no data, NS = normal sodium Na = sodium, NYHA = New York Heart Association, CHF = congestive heart

failure, HSS = hypertonic saline solution, HHD = hypertensive heart disease. Listed first are data obtained from patients receiving a low sodium diet with data from patients assigned to a normal sodium diet following.
