# Supplementary material for: Retraction
Source: HighWire-hosted journal article supplement (doi:10.1136/heartjnl-2012-302337), 2012-08-21
Supplement: heartjnl-2012-302337-s4.pdf [file heartjnl-2012-302337-s4.pdf]

Supplemental Table 2

| Quality of Published Studies Reporting Use of a Low Sodium Versus a Normal Sodium Diet |                |                           |                                              |                         |                     |                  |         |                              |                                    |
|----------------------------------------------------------------------------------------|----------------|---------------------------|----------------------------------------------|-------------------------|---------------------|------------------|---------|------------------------------|------------------------------------|
| Author, Year<br>(Reference)                                                            | Jadad<br>Score | Allocation<br>Concealment | Similarity<br>of Baseline<br>Characteristics | Eligibility<br>Criteria | Blinding            |                  |         | Completeness<br>of follow up | Intention-<br>to-Treat<br>Analysis |
|                                                                                        |                |                           |                                              |                         | Outcome<br>Assessor | Care<br>Provider | Patient |                              |                                    |
| Parrinello<br>2009 <sub>1</sub>                                                        | 5              | Yes                       | Yes                                          | Yes                     | Yes                 | Yes              | Yes     | Yes                          | Yes                                |
| Licata<br>2003                                                                         | 3              | Yes                       | Yes                                          | Yes                     | Yes                 | No               | Yes     | Yes                          | Yes                                |
| Paterna<br>2005                                                                        | 5              | Yes                       | Yes                                          | Yes                     | Yes                 | Yes              | Yes     | Yes                          | Yes                                |
| Paterna<br>2009                                                                        | 3              | Yes                       | Yes                                          | Yes                     | Yes                 | Yes              | No      | Yes                          | Yes                                |
| Paterna<br>2011                                                                        | 3              | Yes                       | Yes                                          | Yes                     | Yes                 | Yes              | Yes     | Yes                          | Yes                                |
| Paterna<br>2008                                                                        | 3              | Yes                       | Yes                                          | Yes                     | Yes                 | Yes              | No      | Yes                          | Yes                                |
